# Supplementary material
Source: Springer Nature journal article supplement (https://www.springermedizin.de/resource/supplementary/13054_2011_9531_MOESM3_ESM.pdf/9706382)

MAP (mm Hg)

RM1

RM2

RM3

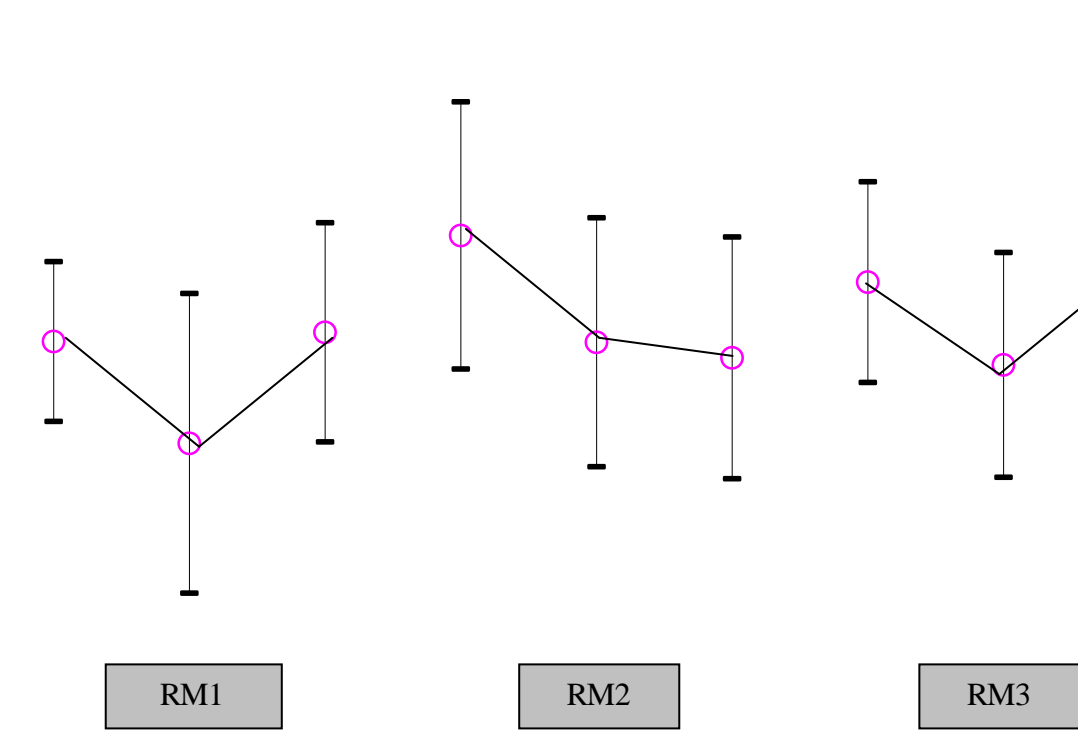

Supplement: MOESM3 [file 9706382]
